# Supplementary figures and images for: A potential novel inflammation biomarker for predicting the prognosis of decompensated liver cirrhosis
Source: PubMed Central journal article supplement — Ann Med. 2022 Nov 12;54(1):3201–10. doi: 10.1080/07853890.2022.2142277 (PMC9662056; doi:10.1080/07853890.2022.2142277), 2022-11-12

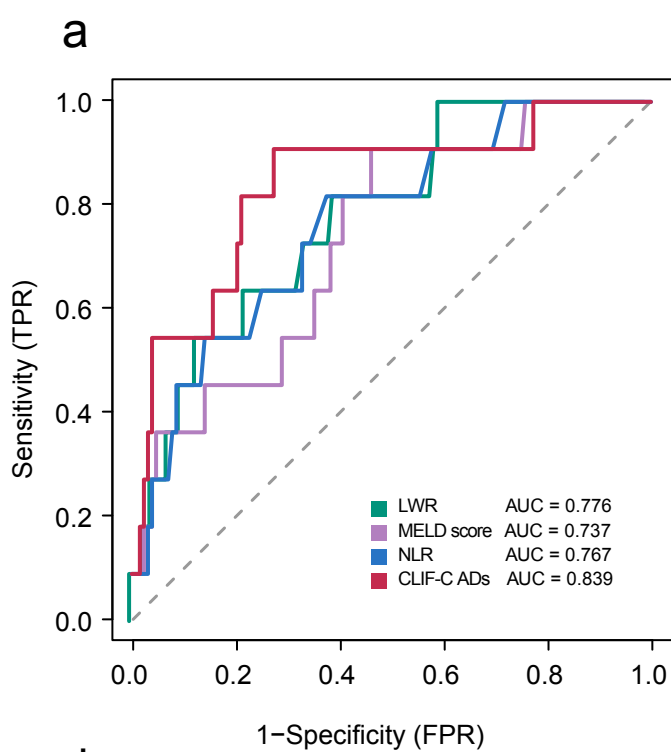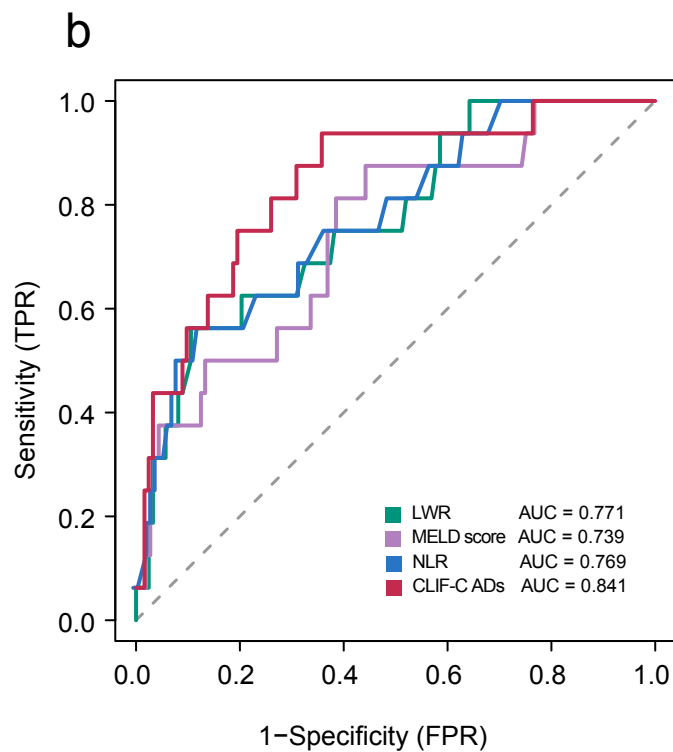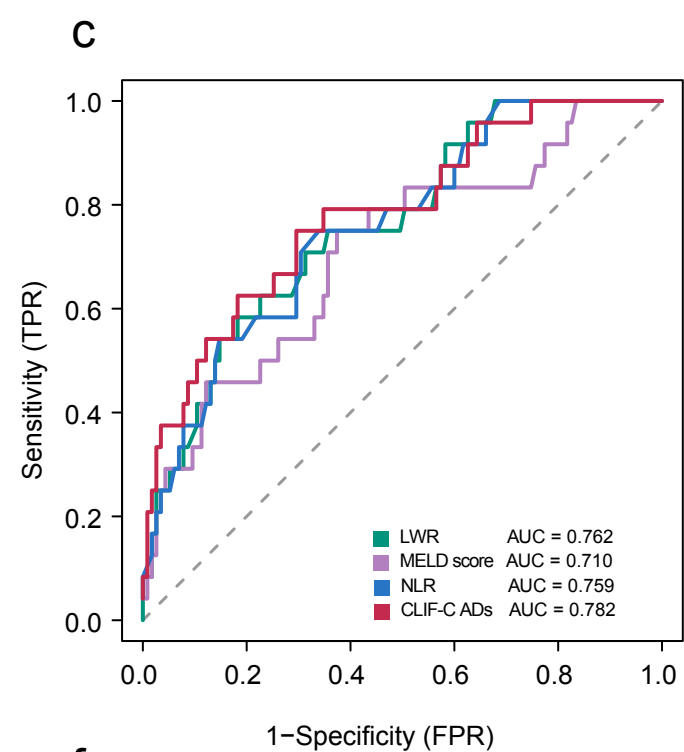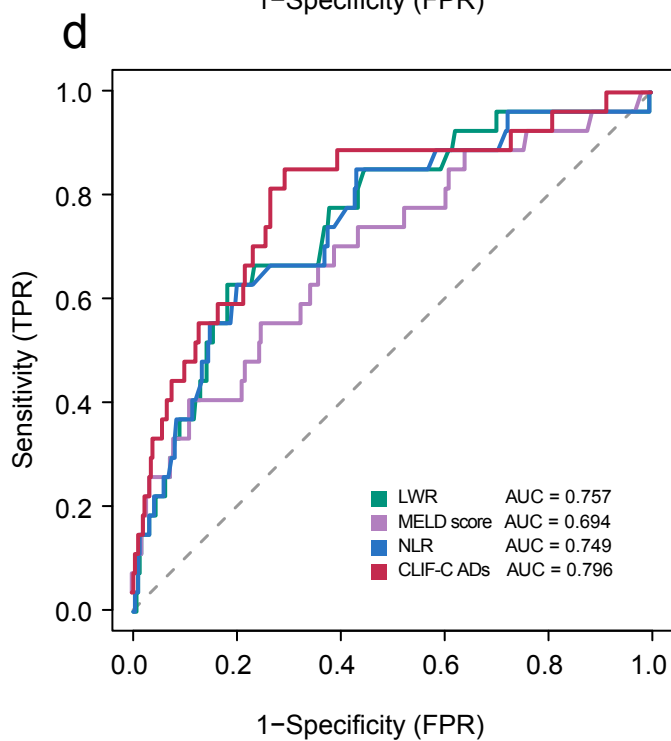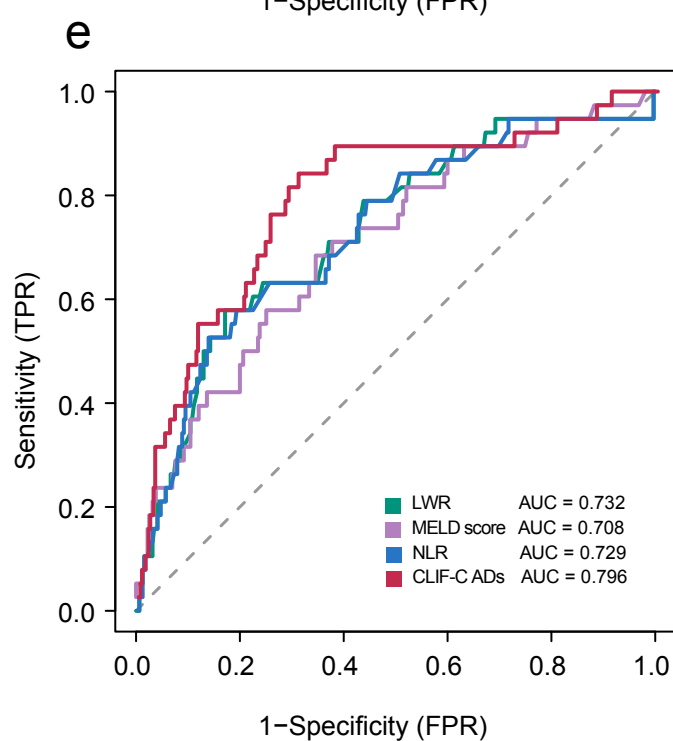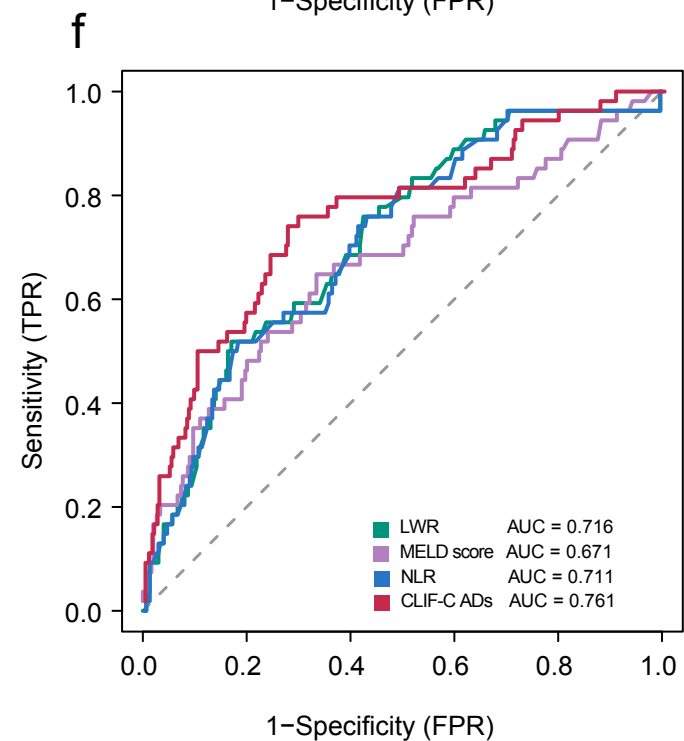

Supplement: IANN_A_2142277_SM3098.pdf [file IANN_A_2142277_SM3098.pdf]
